# Supplementary material
Source: HighWire-hosted journal article supplement (https://erj.ersjournals.com/content/55/1/1900646)
Supplement: inline-supplementary-material-1 [file inline-supplementary-material-1.pdf]

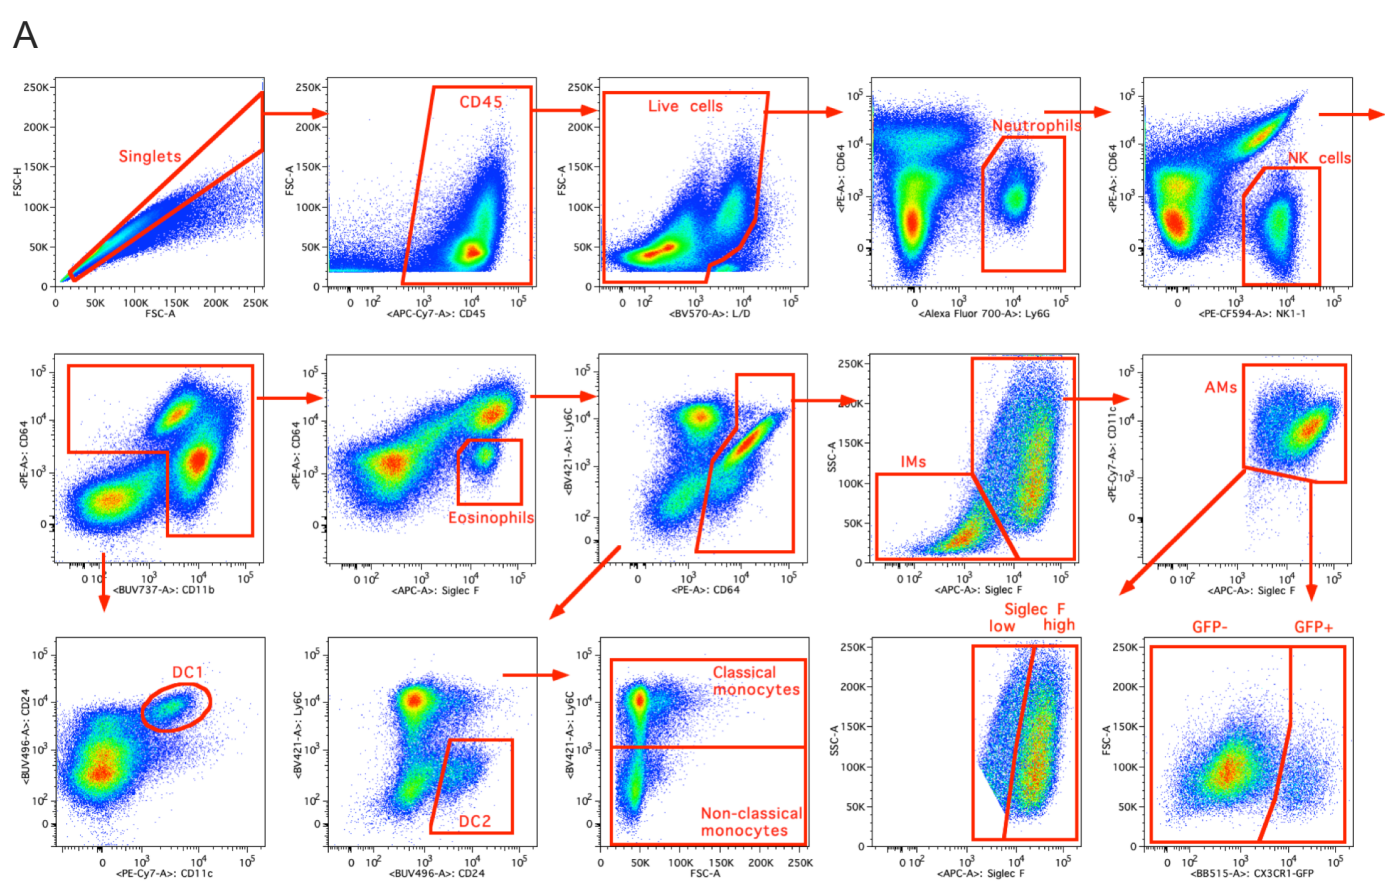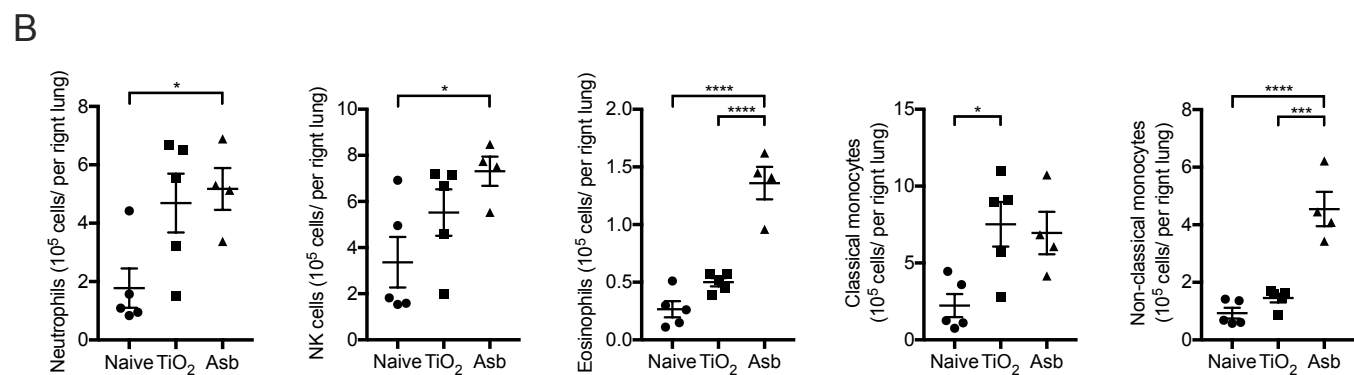

Figure S1 (refers to Figure 1): A. Gating strategy for quantification of myeloid populations in the lung. B. Quantification of myeloid cell populations by flow cytometry 14 days after mice were administered crocidolite asbestos or TiO<sub>2</sub> (both at 100 µg, intratracheally). All data presented as mean ± SEM, 4–5 mice per group, one-way ANOVA with Tukey-Kramer test for multiple comparisons; \*, P < 0.05; \*\*, P < 0.01; \*\*\*\*, P < 0.0001. Representative data from two independent experiments is shown.

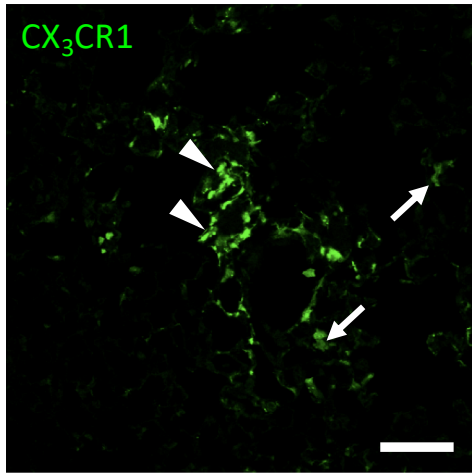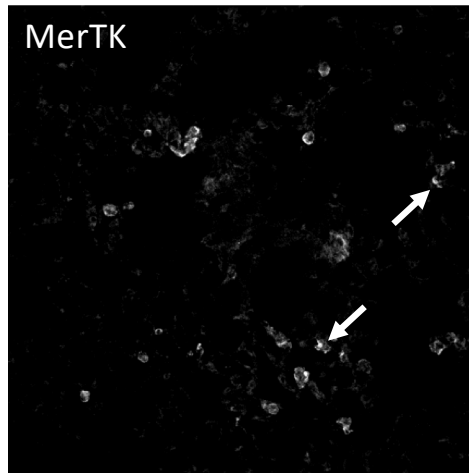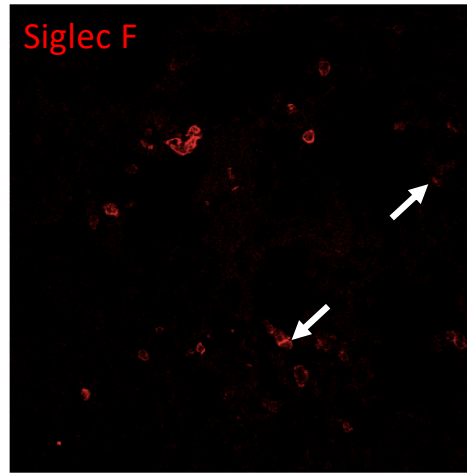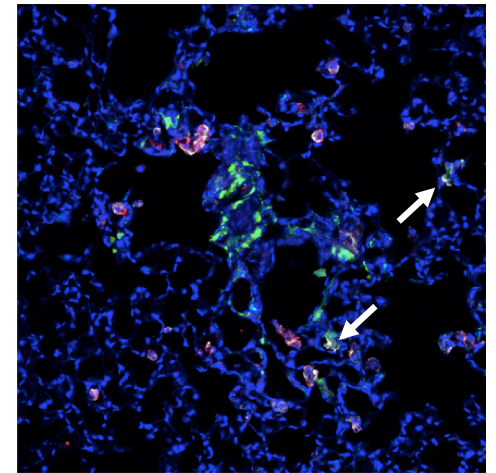

Figure S2: Monocyte-derived alveolar macrophages express canonical alveolar macrophage markers after asbestos exposure (refers to Figure 2). Representative fluorescent images showing expression of CX3CR1-GFP (green), MerTK (white), and Siglec F (red). Note, monocyte-derived alveolar macrophages are CX3CR1-GFP+MerTK+Siglec F+ (arrows), whereas peribronchial macrophages are CX3CR1-GFP+MerTK-Siglec F- (arrowheads). Scale bar 100  $\mu$ m.



A

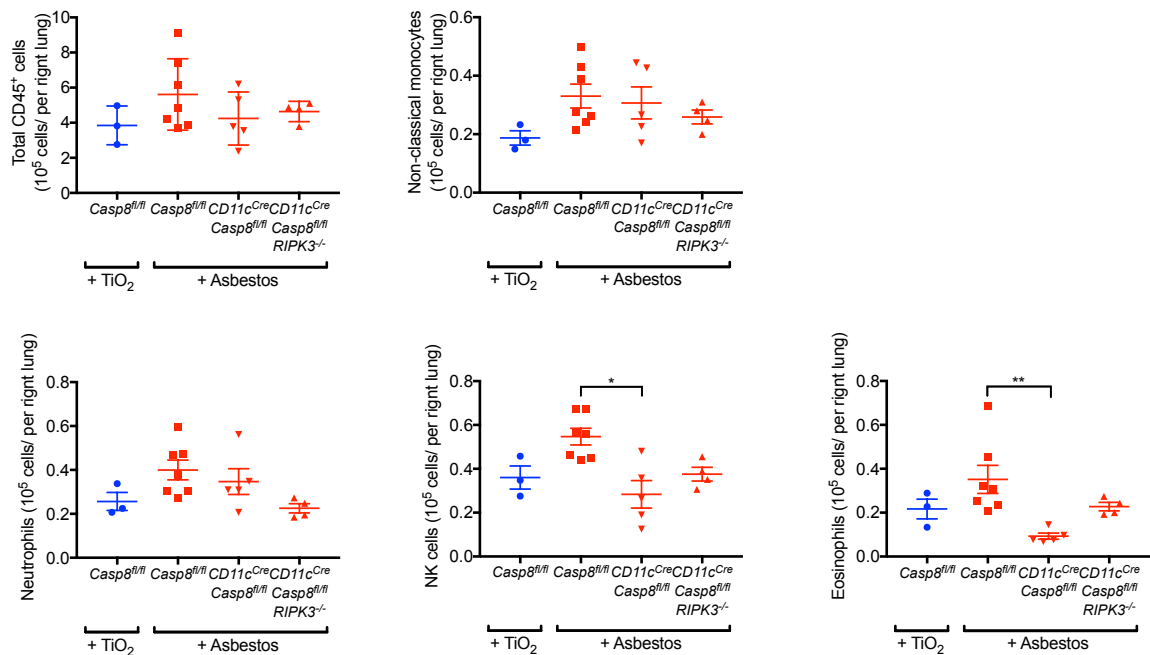

B

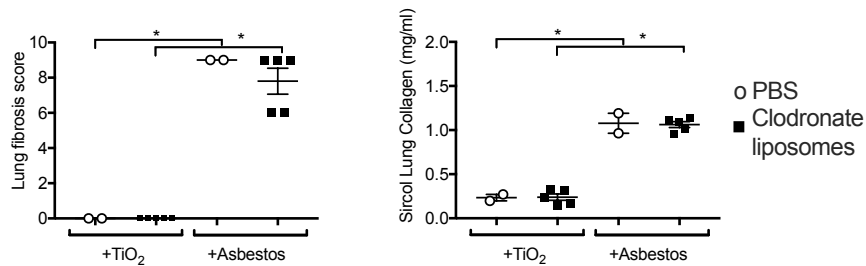

Figure S3: Monocyte-derived and not tissue-resident alveolar macrophages are required for the development of asbestos-induced pulmonary fibrosis (Refers to Figure 3). A. Quantification of myeloid cell populations by flow cytometry 28 days after mice were administered crocidolite asbestos or TiO<sub>2</sub> (both at 100 µg, intratracheally). All data presented as mean ± SEM, 3–7 mice per group, one-way ANOVA, with Bonferroni correction for multiple comparisons. \* p<0.05. B. Depletion of tissue-resident alveolar macrophages does not alter the severity of asbestos-induced fibrosis. Blinded scoring of a single longitudinal section from each mouse and quantification of soluble collagen in lung homogenates. Circles refer to controls (PBS) and squares refer to treatment with clodronate-loaded liposomes. All data presented as mean ± SEM, 2–5 mice per group, one-way ANOVA, with Tukey-Kramer test for multiple comparisons. \*, p<0.05; \*\*, p< 0.01.

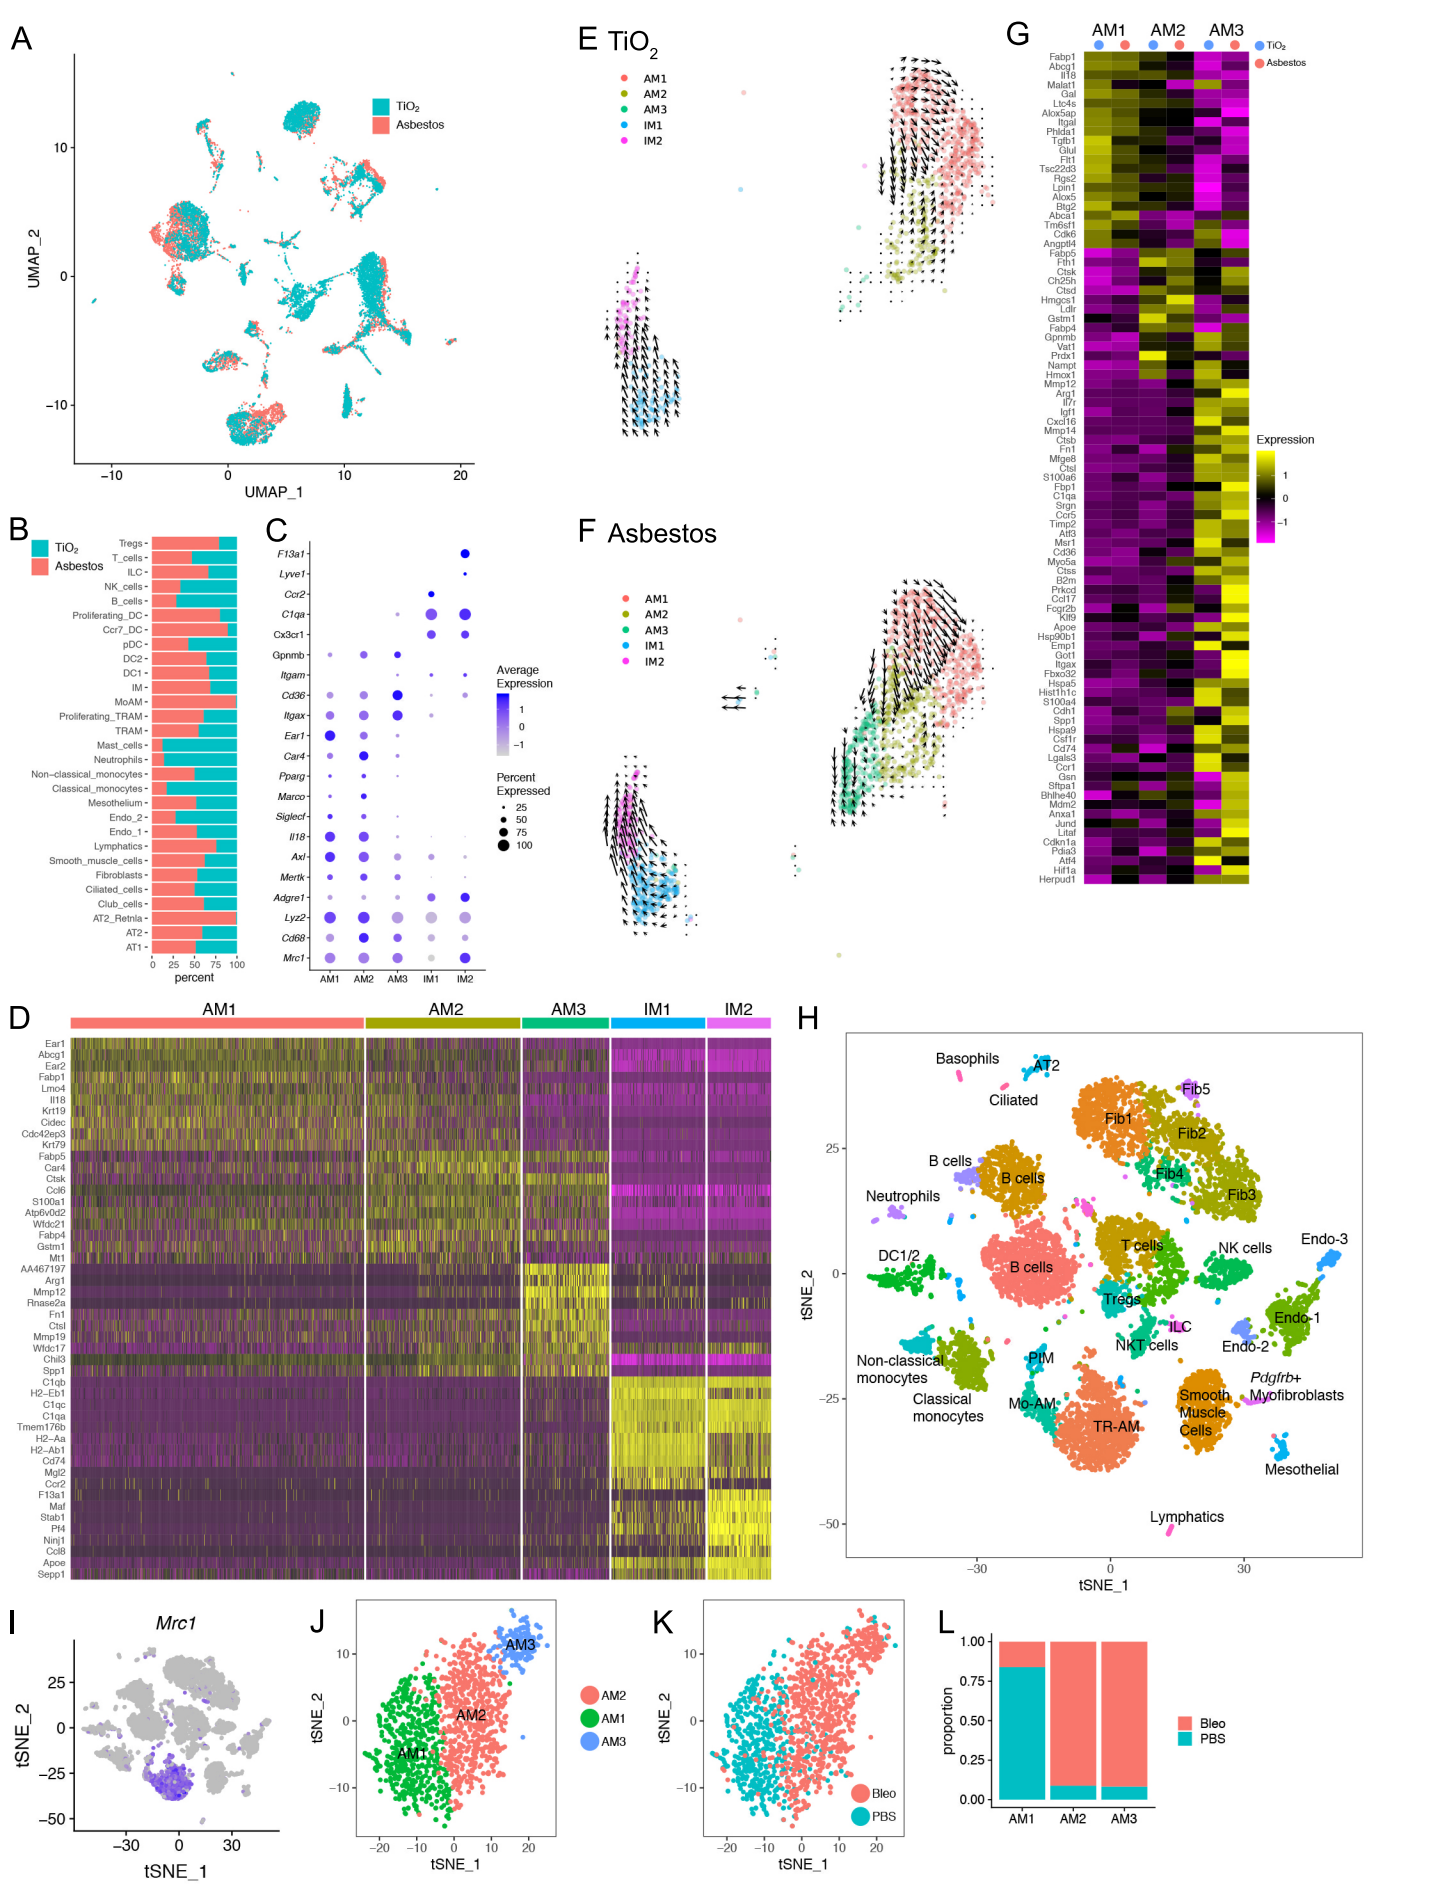

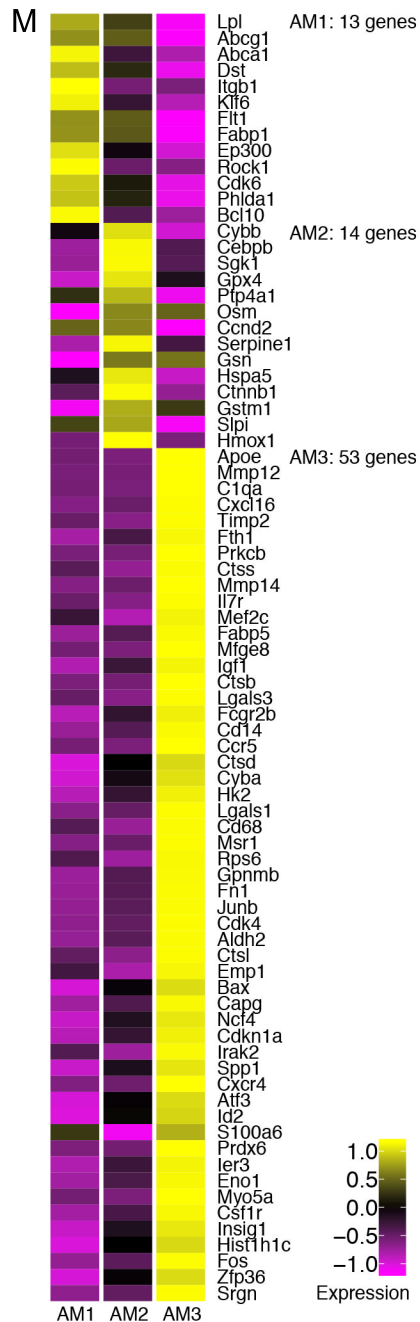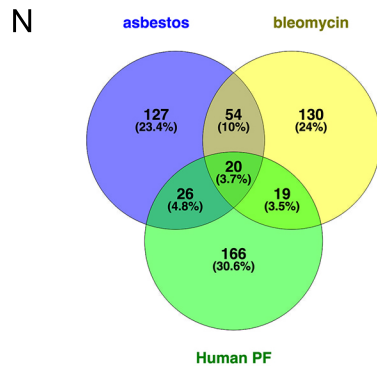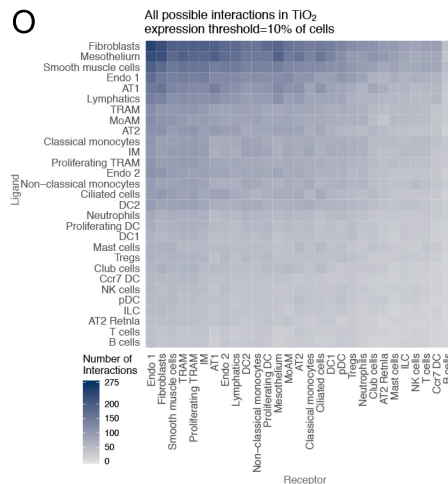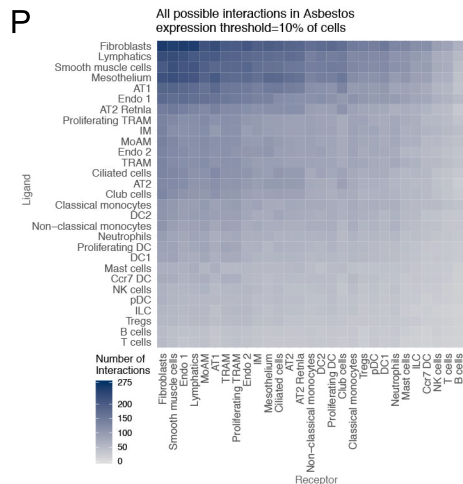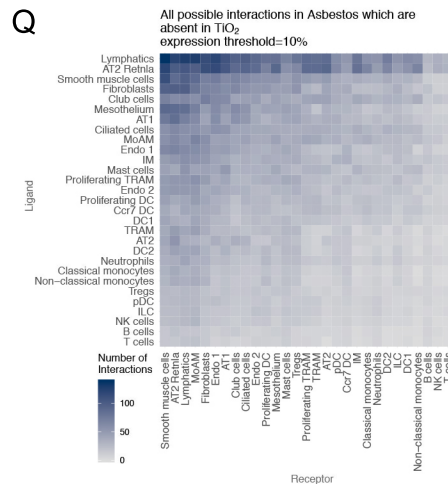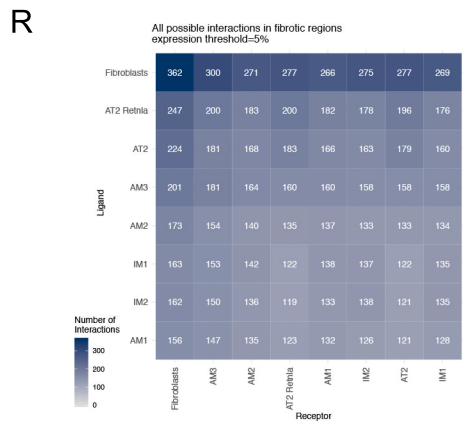

Figure S4: Single-cell RNA-seq identifies heterogeneous response of resident lung cellular populations during asbestos-induced pulmonary fibrosis (refers to Figure 4). A-B. UMAP plot (A) and bar plot (B) demonstrating composition of cell clusters. One mouse per library/condition. C. Dot plot demonstrating expression of selected genes in macrophage subclusters. D. Heatmap of top 10 genes (by log fold change) characterizing macrophage subclusters. E-F. RNA Velocity field projected onto UMAP-plot from Figure 4C: alveolar and interstitial macrophage subsets from (E) TiO<sub>2</sub> and (F) asbestos-exposed lungs (derived from Figure 4C). Cluster AM3 has no outbound vectors, which suggests that it is a transcriptionally stable cell state, rather than an intermediate state between monocyte to tissue-resident macrophage differentiation. G. Heatmap of 93 genes overlapping between genes expressed in alveolar macrophages and pulmonary fibrosis-associated genes from the Comparative Toxicogenomic Database (947 genes as of February 2019) ( $p = 4.561944e-06$  for cluster AM3, hypergeometric probability test). H. tSNE plot demonstrating cell clusters (10,372 cells) identified by single-cell RNA-seq 21 days after PBS or bleomycin treatment, three mice per condition. Data from Xie et al., 2018. I. Macrophages were identified using canonical lineage-restricted markers, such as *Mrc1*, as shown on a tSNE plot. J. Focused analysis of alveolar macrophages identifies 3 subclusters: AM1, AM2, AM3. K. tSNE and L. bar plot demonstrating composition of alveolar macrophages clusters. M. Heatmap showing 80 genes overlapping between genes expressed in alveolar macrophages in Xie et al. dataset and pulmonary fibrosis-associated genes from the Comparative Toxicogenomic Database (947 genes as of February 2019) ( $p = 3.388409e-05$  for cluster AM3, hypergeometric probability test). N. Venn diagram showing overlap between the genes in cluster AM3 from asbestos dataset, cluster AM3 in Xie et al. 2018 dataset and genes from the profibrotic macrophage cluster (cluster 1) from Reyfman et al., 2018. List of 20 genes overlapping between three datasets is shown. See also Supplemental table S5. O-R. Analysis of ligand-receptor interactions emerging between the cell types during the asbestos-induced pulmonary fibrosis. All possible ligand-receptor interactions in mice exposed to TiO<sub>2</sub> (O) and asbestos (P), and genes uniquely present only in asbestos-exposed mice (Q), only genes expressed in at least 10% cells were used for analysis. R. Analysis of the ligand-receptor pairs between the cells located in the close anatomical proximity in the distal lung parenchyma during asbestos-induced pulmonary fibrosis, only genes expressed in at least 5% of the cells were used. See Methods and online code for details.



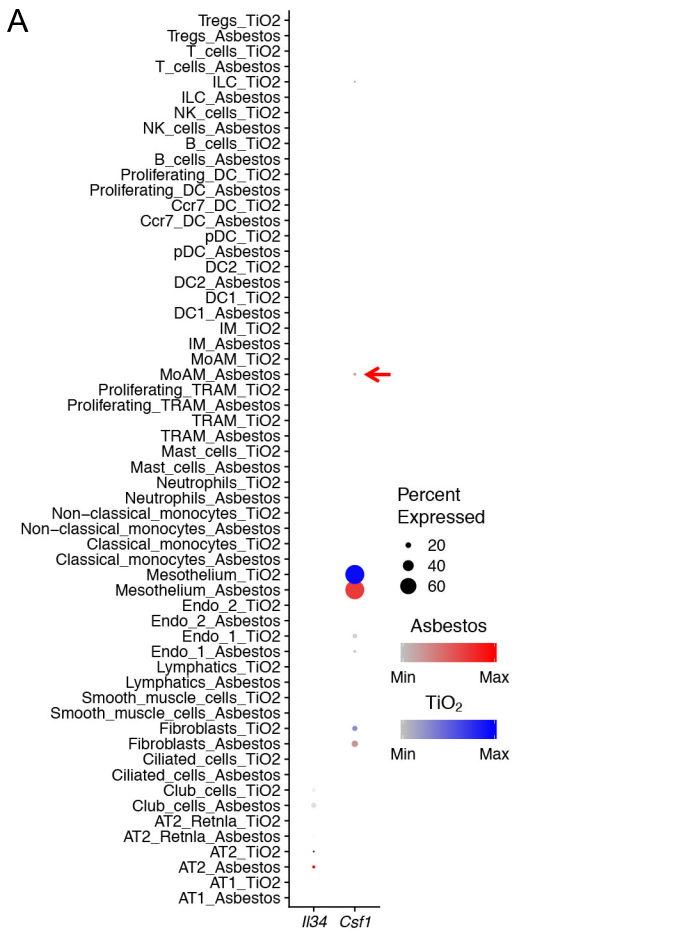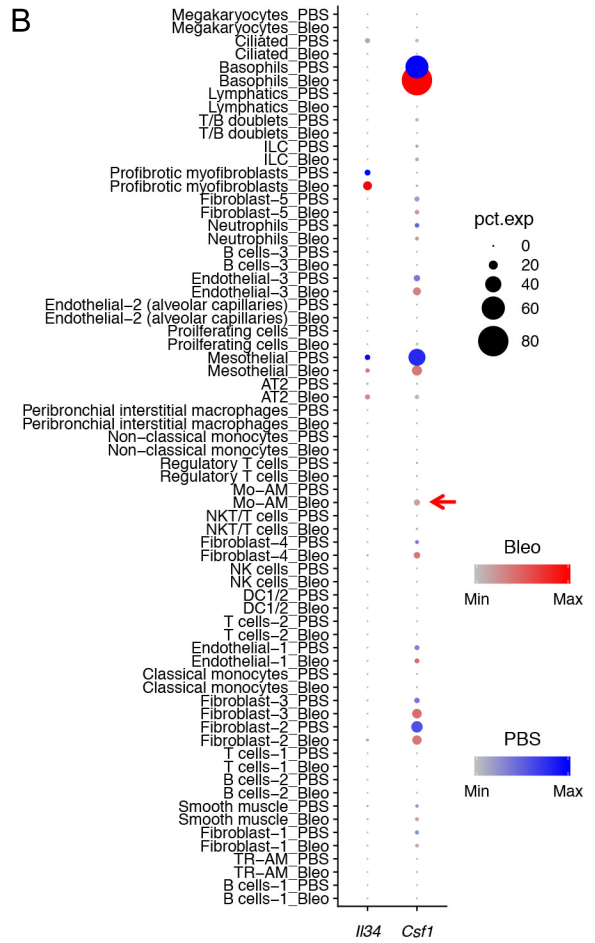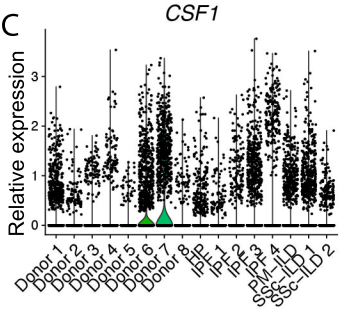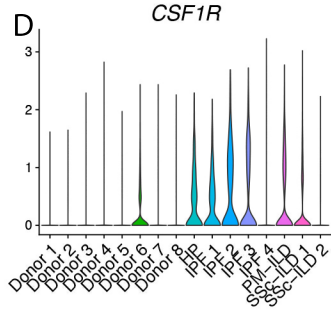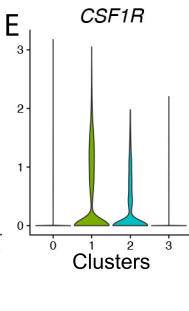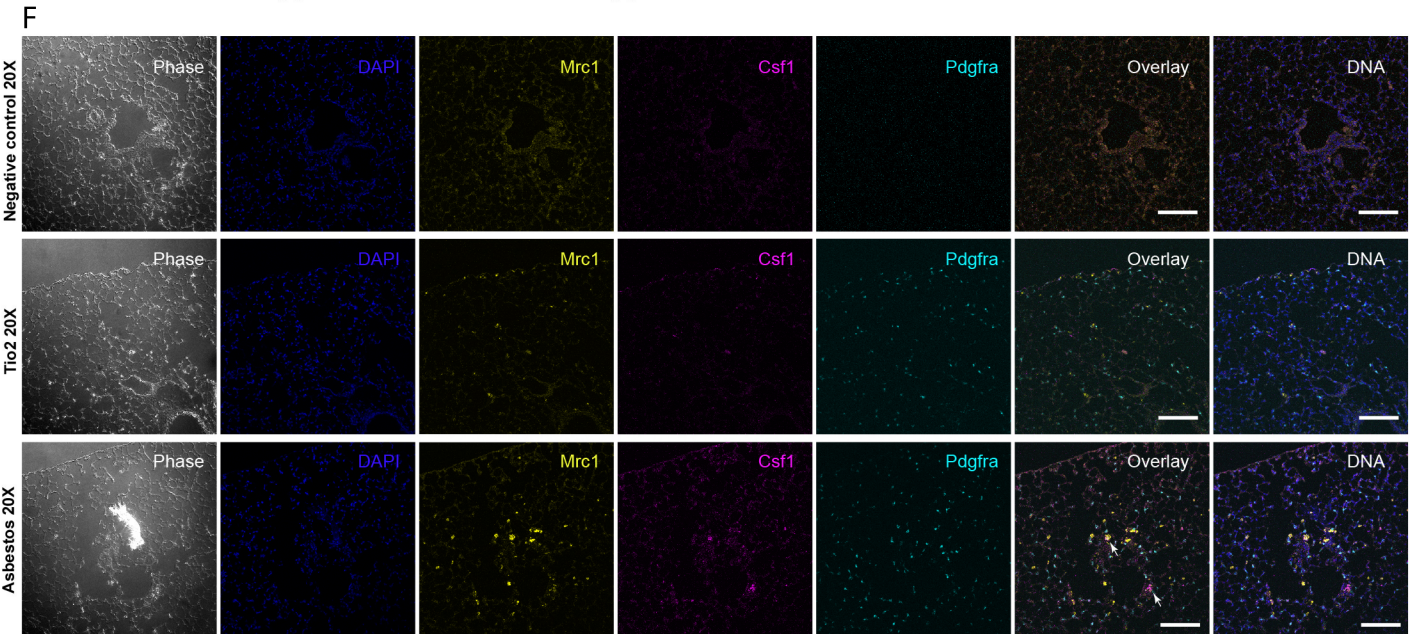

Figure S5: M-CSF/M-CSFR signaling is required for maintenance of monocyte-derived alveolar macrophages in fibrotic niches (refers to Figure 5). A-B. Dot plot showing expression of *Csf1* and *Il34* across cell types during (A) asbestos- and (B) bleomycin-induced pulmonary fibrosis. Arrows point out expression of *Csf1* in monocyte-derived alveolar macrophages. C. CSF1 is expressed in human alveolar macrophages in all 8 donor lungs and 8 lungs from patients with pulmonary fibrosis. D-E. Expression of CSF1R is increased in alveolar macrophages from patients with pulmonary fibrosis, specifically, in cluster 1, containing profibrotic alveolar macrophages. Data from Reyfman et al. 2019. F. In situ RNA hybridization confirms expression of *Csf1* in alveolar macrophages during pulmonary fibrosis. Analysis performed on day 28 post-TiO<sub>2</sub> or asbestos exposure. Top row: negative controls (no primary probe), demonstrating level of autofluorescence in the tissue. Scale bar is 50  $\mu$ m.

Asbestos 20X

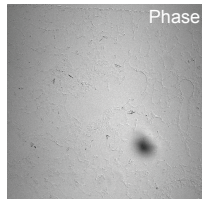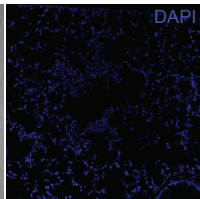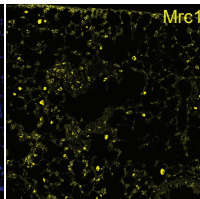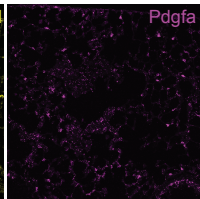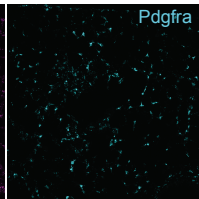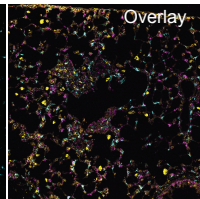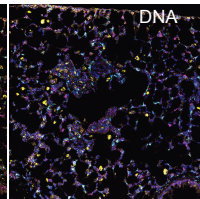

TiO2 20X

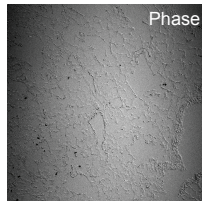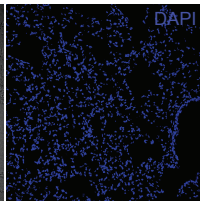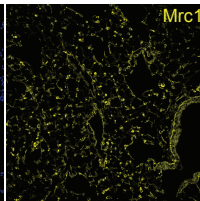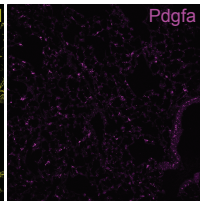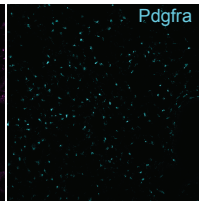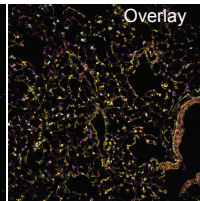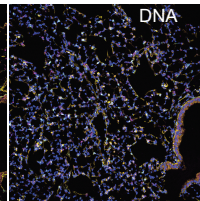



Figure S6: Monocyte-derived alveolar macrophages express Pdgfa which is required for fibroblast proliferation (refers to Figure 6). In situ RNA hybridization confirms expression of Pdgfa in alveolar macrophages during pulmonary fibrosis, 20× magnification. Analysis performed on day 28 post-TiO<sub>2</sub> or asbestos exposure. Scale bar is 50 μm.

AT2-1

AT2-2

AT2-3AT2-4

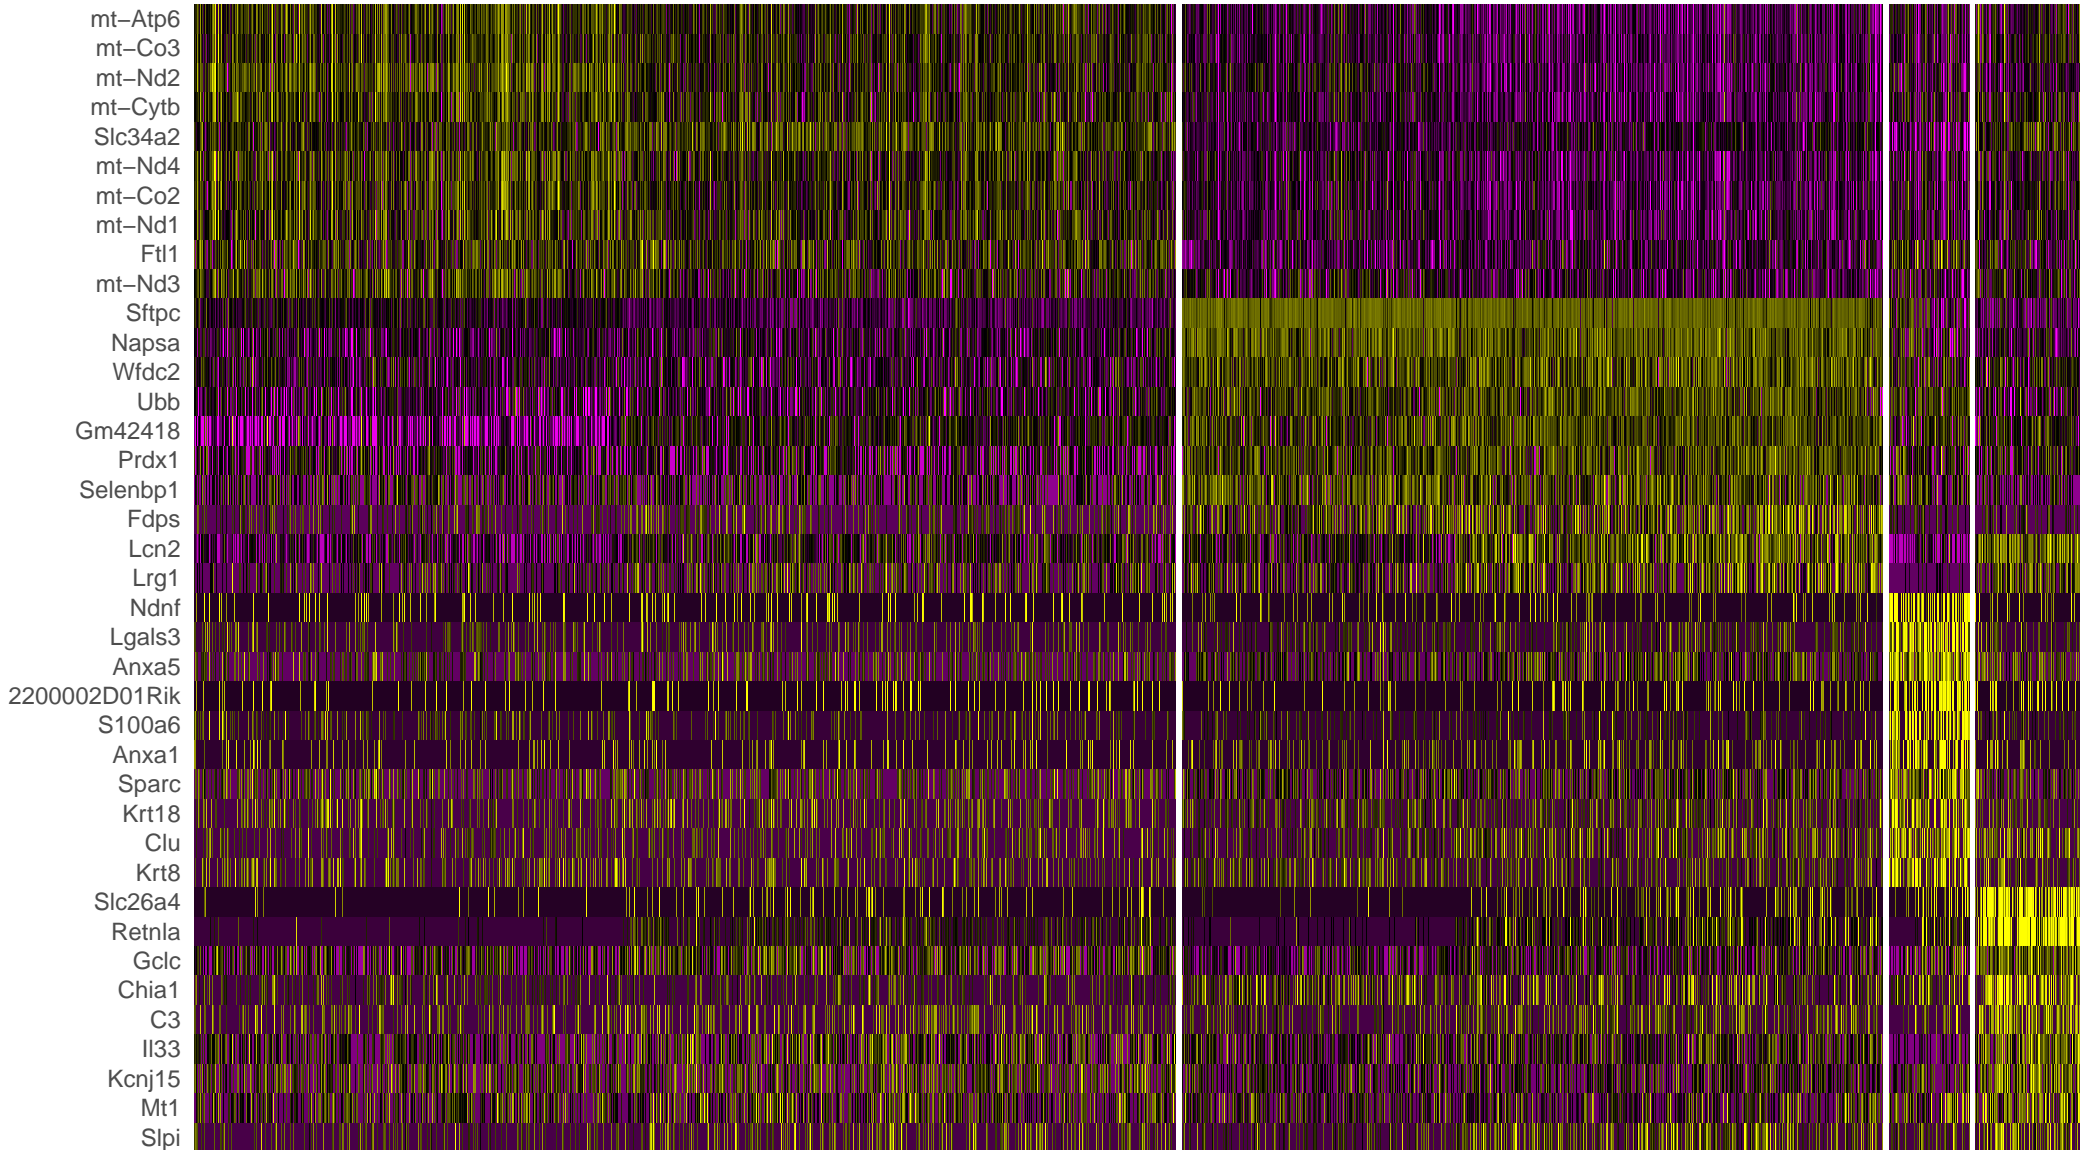

Figure S7: Heatmap of the top 10 differentially expressing genes for sub-clusters within alveolar type II cells (refers to Figure 7).
